# Supplementary material for: Developmental Ethanol Exposure Leads to Dysregulation of Lipid Metabolism and Oxidative Stress in Drosophila
Source: PubMed Central journal article supplement (PMC4291469; doi:10.1534/g3.114.015040), 2014-11-11
Supplement: supp_g3.114.015040_FigureS1.pdf [file supp_g3.114.015040_FigureS1.pdf]

Figure S1

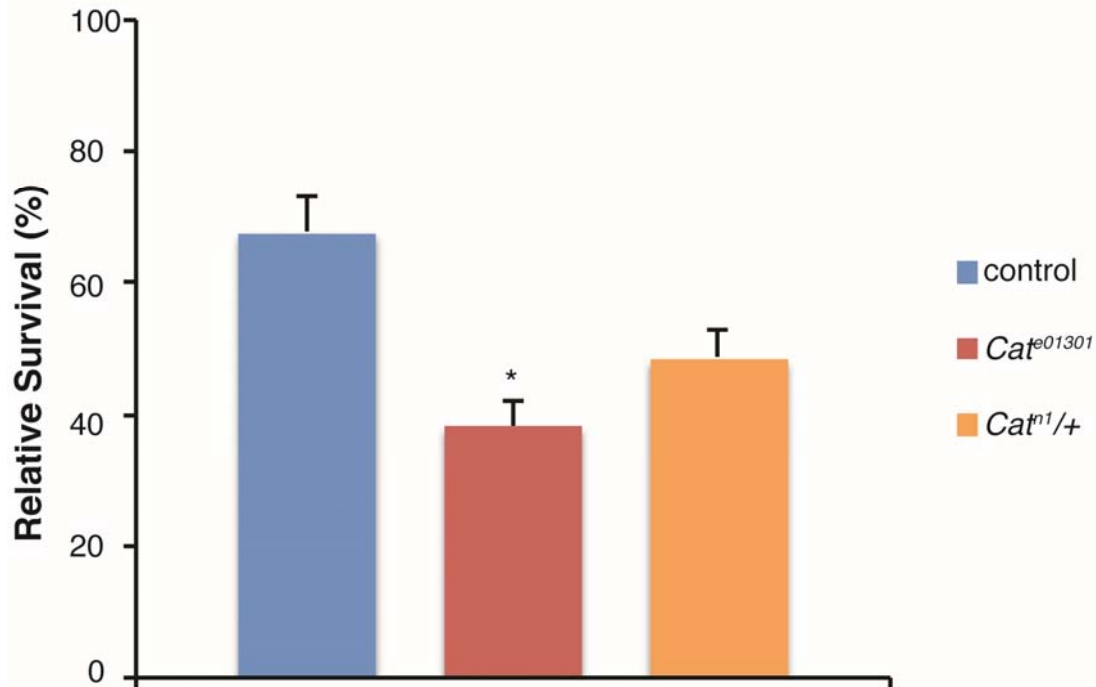

**Figure S1 Additional alleles of *Cat* are sensitive to ethanol.** Flies homozygous for *Cat*<sup>e01301</sup> are sensitive to ethanol-induced developmental lethality, and flies heterozygous for the null allele *Cat*<sup>n1</sup> show a trend towards increased lethality, but this effect does not achieve statistical significance. \*:  $P < 0.05$ , one-way ANOVA with Tukey HSD posthoc analysis.
